# Supplementary material
Source: PubMed Central journal article supplement (PMC5974288)
Supplement: jgv-97-880-s001.pdf [file jgv-97-880-s001.pdf]

Table S1. Data collection and refinement statistics (SAD)

|                                                         | Se Derivative ns <sup>2</sup> <sup>1-199</sup> |
|---------------------------------------------------------|------------------------------------------------|
| <b>Data collection</b>                                  |                                                |
| Wave length                                             | 0.97917                                        |
| Space group                                             | <i>P4<sub>1</sub>22</i>                        |
| Cell dimensions                                         |                                                |
| <i>a</i> , <i>b</i> , <i>c</i> (Å)                      | 101.0, 101.0, 165.8                            |
| $\alpha$ , $\beta$ , $\gamma$ (°)                       | 90.0, 90.0, 90.0                               |
| Resolution (Å)                                          | 50-3.05 (3.16-3.05) *                          |
| Unique reflections                                      | 31292                                          |
| <i>R</i> <sub>merge</sub> (%)                           | 9.0 (73.5)                                     |
| <i>I</i> / $\sigma$ <i>I</i>                            | 20.6 (3.8)                                     |
| Completeness (%)                                        | 98.9 (96.3)                                    |
| Redundancy                                              | 8.5 (8.6)                                      |
| Structure determination                                 |                                                |
| Figure of merit (by SAD)                                | 0.45                                           |
| Figure of merit (after density modification)            | 0.81                                           |
| <b>Refinement</b>                                       |                                                |
| Resolution (Å)                                          | 48.49-3.05                                     |
| No. reflections                                         | 31252                                          |
| <i>R</i> <sub>work</sub> / <i>R</i> <sub>free</sub> (%) | 23.1/27.1                                      |
| No. atoms                                               |                                                |
| Protein                                                 | 2511                                           |
| Ligand/ion                                              | 0                                              |
| R.m.s. deviations                                       |                                                |
| Bond lengths (Å)                                        | 0.01                                           |
| Bond angles (°)                                         | 1.24                                           |
| Average B-factor                                        |                                                |
| Mean                                                    | 69                                             |
| Ramachandran plot                                       |                                                |
| Most favored (%)                                        | 91                                             |
| Outlier (%)                                             | 3                                              |

\*Values in parentheses are for the highest-resolution shell.
